# Supplementary material for: Sensitively distinguishing intracellular precursor and mature microRNA abundance
Source: PubMed Central journal article supplement — Chem Sci. 2018 Nov 28;10(6):1709–15. doi: 10.1039/c8sc03305f (PMC6368210; doi:10.1039/c8sc03305f), 2018-11-28
Supplement: SC-010-C8SC03305F-s001.pdf [file SC-010-C8SC03305F-s001.pdf]

## Supporting Information

### **Sensitively Distinguish Intracellular Precursor and Mature MicroRNA Abundance**

Fan Yang,<sup>ab</sup> Yaru Cheng,<sup>ab</sup> Yu Cao,<sup>ab</sup> Haifeng Dong<sup>\*ab</sup>, Huiting Lu,<sup>ab</sup> Kai Zhang,<sup>ab</sup> Xiangdan Meng<sup>ab</sup>, Conghui Liu<sup>ab</sup>, and Xueji Zhang<sup>\*ab</sup>

<sup>a</sup> Beijing Advanced Innovation Center for Materials Genome Engineering University of Science and Technology Beijing, 30 Xueyuan Road, Beijing 100083, P.R. China,

<sup>b</sup> Beijing Key Laboratory for Bioengineering and Sensing Technology, Research Center for Bioengineering and Sensing Technology, School of Chemistry & Biological Engineering University of Science & Technology Beijing, 30 Xueyuan Road, Beijing 100083, P.R. China

\*To whom correspondence should be addressed. Email: [hfdong@ustb.edu.cn](mailto:hfdong@ustb.edu.cn) or [zhangxueji@ustb.edu.cn](mailto:zhangxueji@ustb.edu.cn)

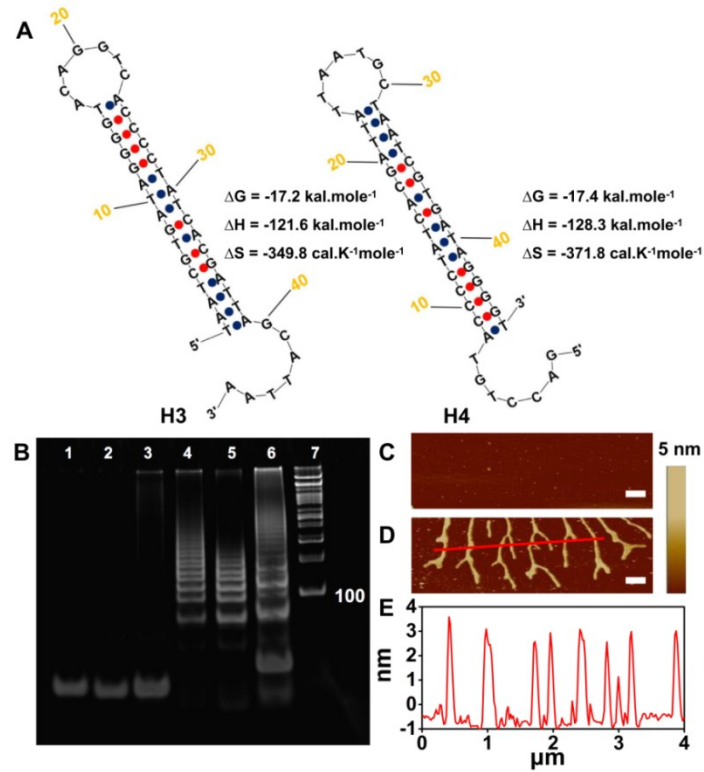

**Fig. S1.** (A) Ideal structure and thermal kinetic parameters of H3, H4. (B) PAGE analysis of HCR. Lanes 1–7 represent H3 (2  $\mu\text{M}$ ), H4 (2  $\mu\text{M}$ ), H3+H4 (2  $\mu\text{M}$  and 2  $\mu\text{M}$ ), H1+H2+miRNA-155 (2  $\mu\text{M}$ , 2  $\mu\text{M}$  and 2  $\mu\text{M}$ ), H1+H2+2 $\times$ miRNA-155 (2  $\mu\text{M}$ , 2  $\mu\text{M}$  and 4  $\mu\text{M}$ ), H3+H4+pre-miRNA-155 (2  $\mu\text{M}$ , 2  $\mu\text{M}$  and 6  $\mu\text{M}$ ), and DNA ladder marker, respectively. AFM phase images of HCR (C) without and (D) with miRNA-155. Scale bar: 500 nm. (E) Cross-section profile of the black line in (D).

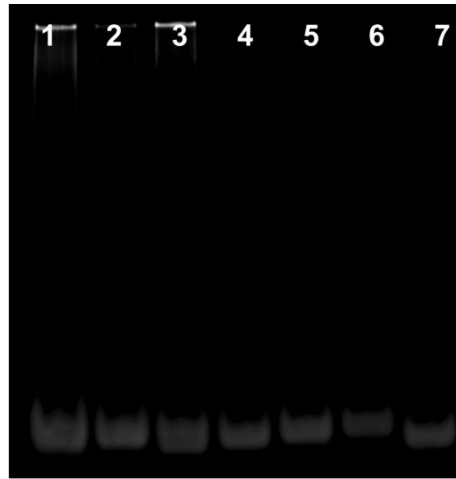

**Fig. S2.** PAGE analysis. Lanes 1–7 represent H1+H2+H3+H4, H3+H4, H1+H2, H4, H3, H2, H1, respectively, each hairpin probe: 2  $\mu$ M.

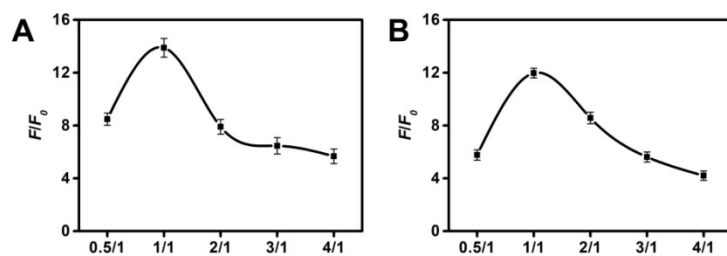

**Fig. S3.** Optimization of the concentration of H1 and H4, respectively. (A) The reaction containing different concentrations of H1 (50, 100, 200, 300, 400 and 500 nM) and H2 (100 nM).  $F$  and  $F_0$  are the fluorescence intensities at (C) 523 nm in the presence and absence of pre-miRNA-155 (100 nM). (B) The reaction containing different concentrations of H3 (50, 100, 200, 300, 400 and 500 nM) and H4 (100 nM).  $F$  and  $F_0$  are the fluorescence intensities at (C) 565 nm in the presence and absence of miRNA-155 (100 nM). The data error bars indicate means  $\pm$  SD (n=3).

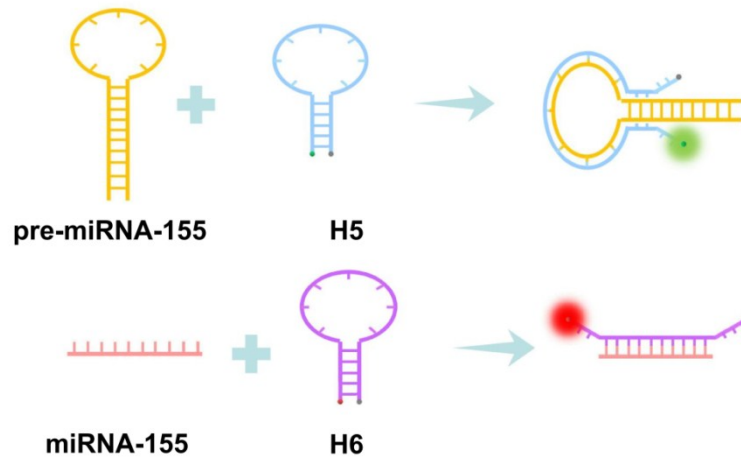

**Fig. S4.** Schematic illustration of pre-miRNA-155 and miRNA-155 hybridization to MB.

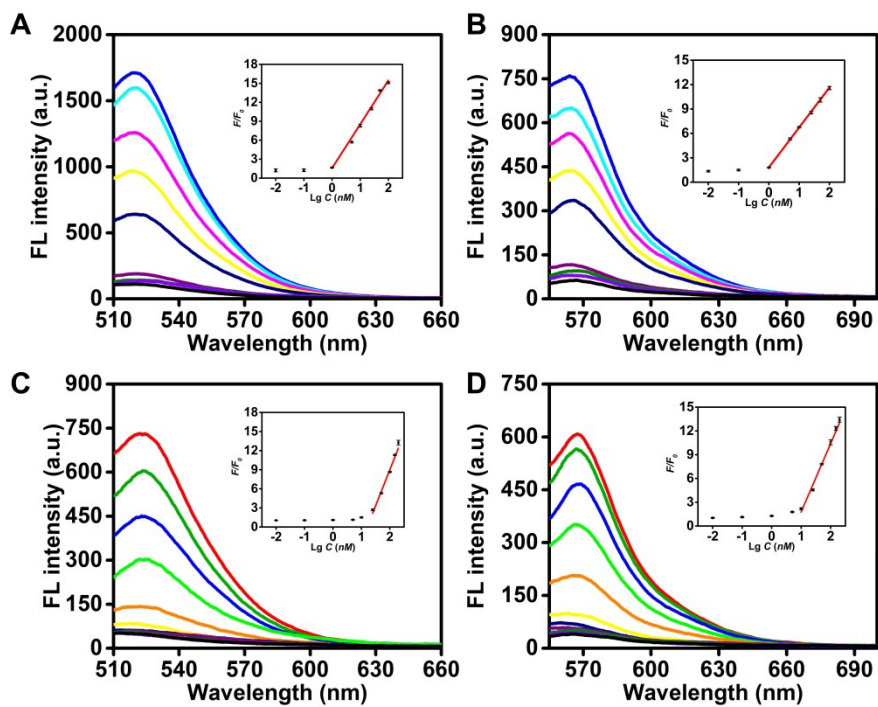

**Fig. S5.** Fluorescence intensity corresponding to HCR (each hairpin probe: 100 nM) response to different concentrations of (A) pre-miRNA-155 and (B) miRNA-155. Fluorescence intensity corresponding to MB (100 nM) response to different concentrations of (C) pre-miRNA-155 and (D) miRNA-155. Insert: linear relationship between the  $F/F_0$  and the logarithm of target concentration.

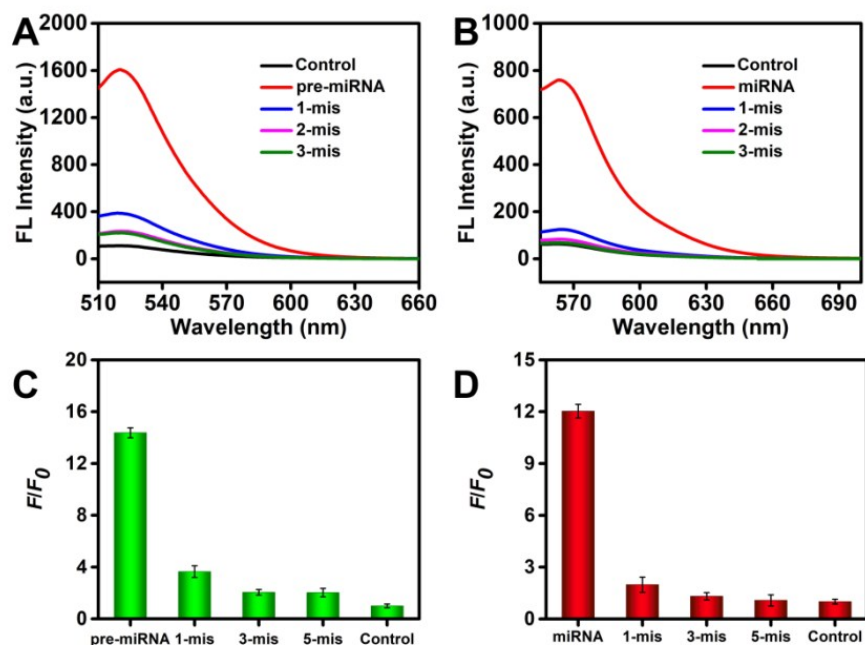

**Fig. S6.** (A) Fluorescence emission spectra of mixture H1 (100 nM) and H2 (100 nM) after incubation with (a) complementary target pre-miRNA-155 (CM) (100 nM), (b) single-base-mismatched strand (mis-1) (100 nM), three-base-mismatched strand (mis-3) (100 nM), five-base-mismatched strand (mis-5) (100 nM) and control; (B) Fluorescence emission spectra of mixture H3 (100 nM) and H4 (100 nM) after incubation with (a) complementary target miRNA-155 (CM) (100 nM), (b) single-base-mismatched strand (mis-1) (100 nM), three-base-mismatched strand (mis-3) (100 nM), five-base-mismatched strand (mis-5) (100 nM) and control; (C) and (D) fluorescence intensity ratio  $F/F_0$  for (A) and (B), respectively.

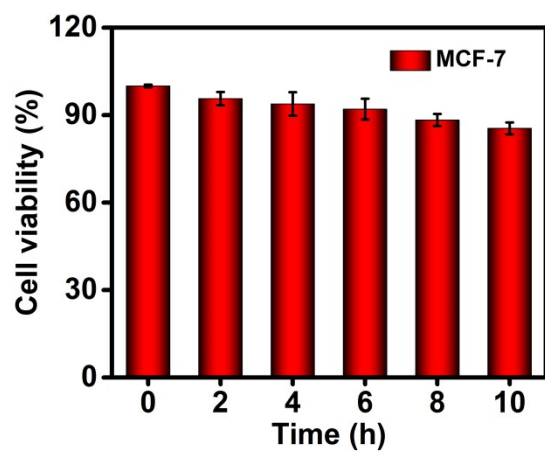

**Fig. S7.** Cell viability assay: MCF-7 cells treated with the H1, H2, H3 and H4 (100 nM) for 2h, 4h, 6h, 8h and 10 h at 37 °C.



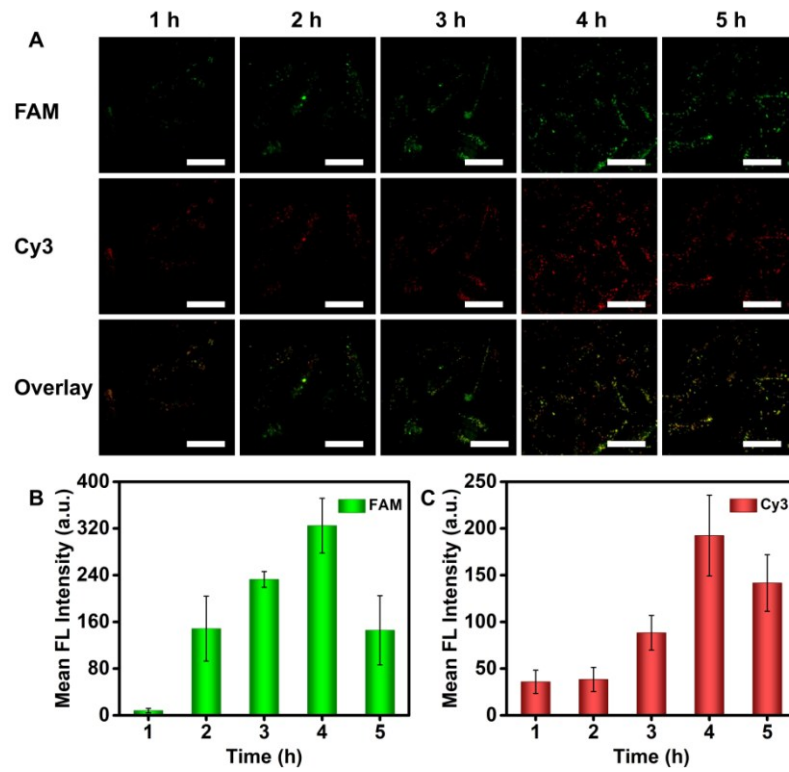

**Fig. S8.** (A) Time course of confocal images of A549 cells incubated with H1 (100 nM), H2 (100 nM), H3 (100 nM) and H4 (100 nM). The scale bar was 40  $\mu\text{m}$ . Histogram of (B) corresponding FAM fluorescence intensity related to pre-miRNA-155 and (C) Cy3 fluorescence intensity associated with miRNA-155 of A549 cells in (A).

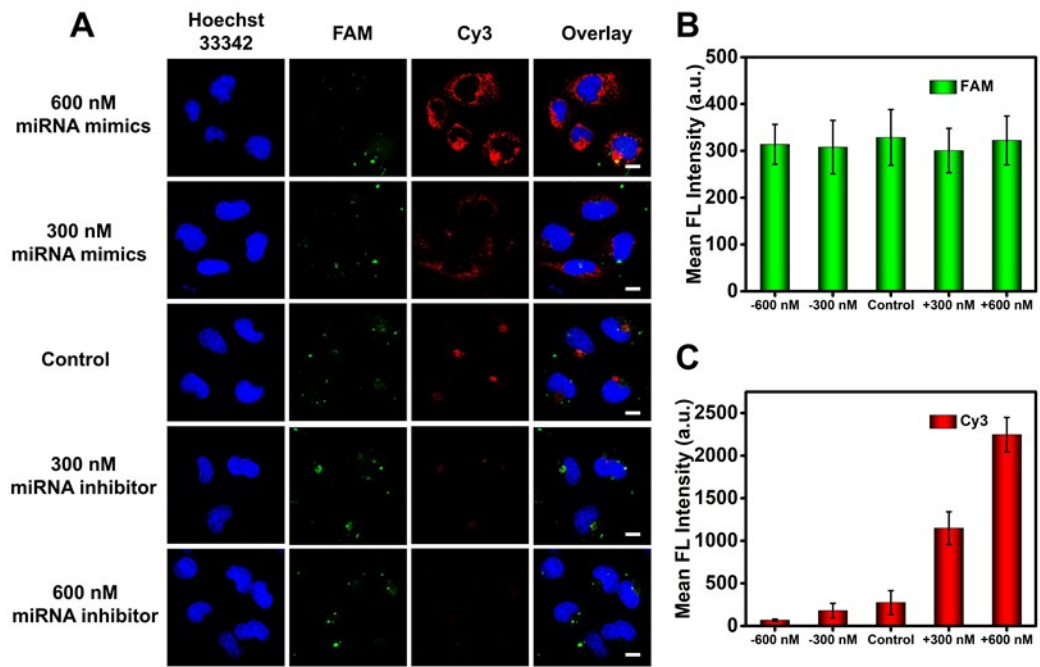

**Fig. S9.** (A) CLSM imaging for MCF-7 cells and A549 cells treated with miRNA-155 mimics (600 nM and 300 nM) and inhibitors (600 nM and 300 nM). The scale bar indicates 40  $\mu$ m. Histogram of (B) corresponding FAM fluorescence intensity related to pre-miRNA-155 and (C) Cy3 fluorescence intensity associated with miRNA-155 of A549 cells in (A).

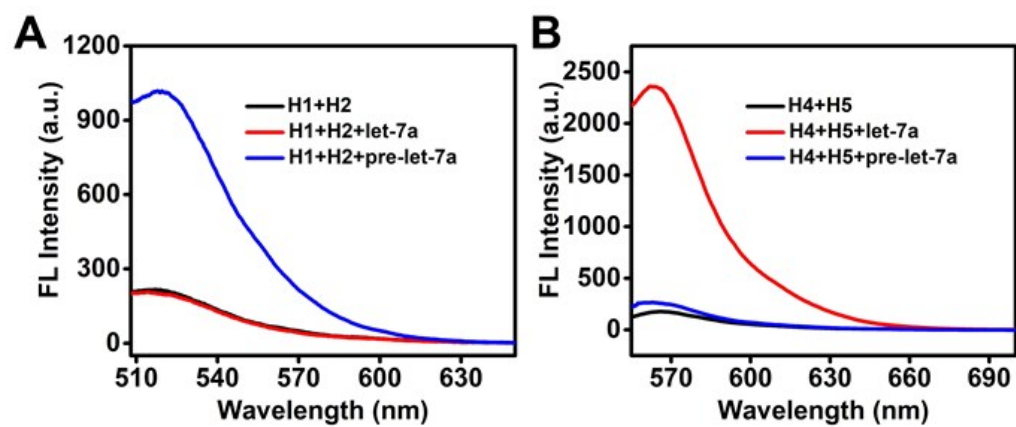

**Fig. S10.** The feasibility of HCR system for mature miRNA *let-7a* and its precursor. The fluorescence intensity of (A) H1 and H2, (B) H3 and H4 response to response to miRNA *let-7a* and pre-miRNA *let-7a*.

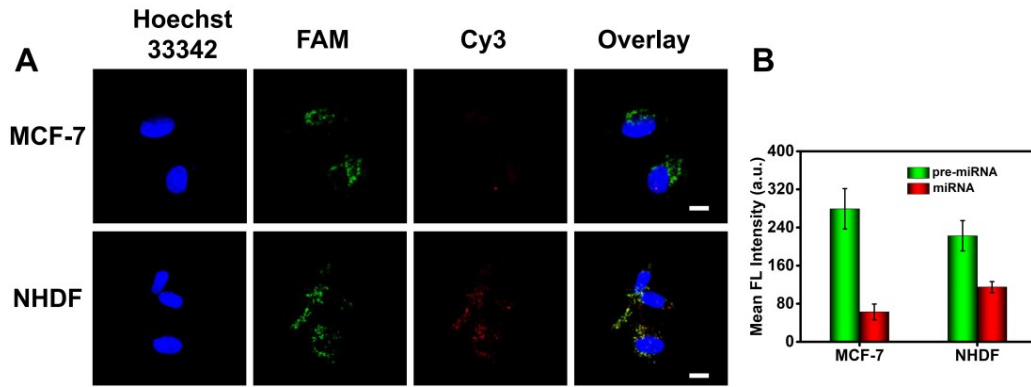

**Fig.S11.** (A) CLSM imaging for MCF-7 cells and NHDF cells incubated with HCR (100 nM). The scale bar indicates 40  $\mu$ m. Histogram of (B) corresponding FAM fluorescence intensity related to pre-miRNA let-7a and (C) Cy3 fluorescence intensity associated with miRNA let-7a in (A).

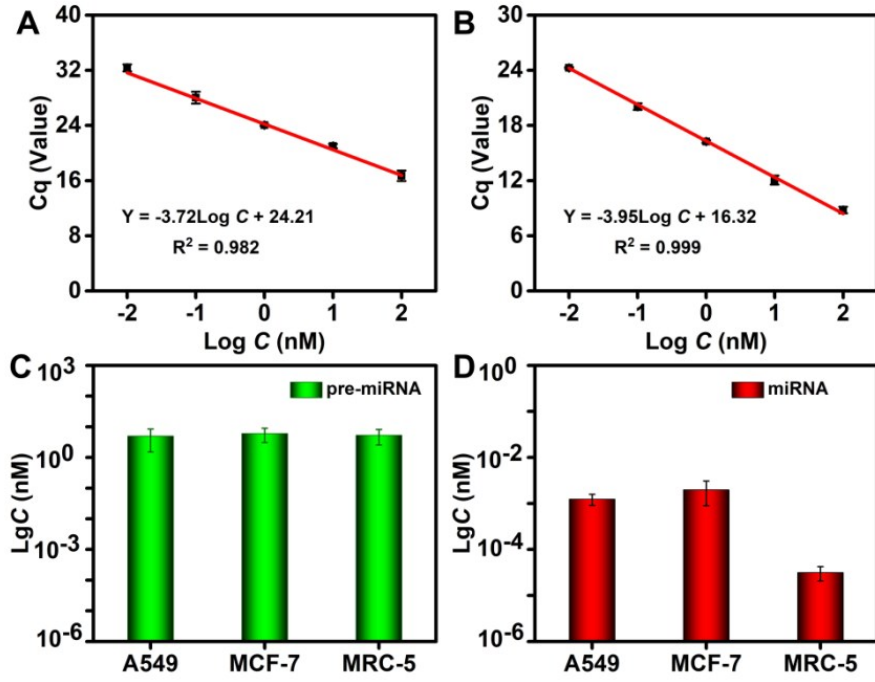

**Fig. S12.** Generation of calibration curve for (A) pre-miRNA-155 and (B) miRNA-155 quantification by qRT-PCR. The qRT-PCR analysis of (C) pre-miRNA-155 and (D) miRNA-155 in A549, MCF-7 and MRC-5 cells.

**Table S1. DNA and RNA sequences used for miRNA-155 detection.**

| Name          | Oligonucleotide sequences (5'–3')                                                 |
|---------------|-----------------------------------------------------------------------------------|
| H1            | TCCA ACTGACTCCTAATGTCGATAGGAGTCAGTTGGAGG<br>CAAAA                                 |
| H2            | TCGACATTAGGAGT-FAMCAGTTGGATTTTGCCTCCA ACT-<br>BHQ1-GACTCCTA                       |
| H3            | TAATCGTGATAGGGGTACAGGTCACCCCTATCACGATTAG<br>CATTAA                                |
| H4            | GACCTGTACCCCTAT-Cy3-CACGATTATTAATGCTAATCGT-<br>BHQ2-GATAGGGGT                     |
| H5            | FAM-ATCGGGTCAGTTGGAGGCAAAAACCCGAT-BHQ1                                            |
| H6            | Cy3-CCGGGTACCCCTATCACGATTAGCATTAAACCCGG-<br>BHQ2                                  |
| T1            | CTGTTAATGCTAATCGTGATAGGGGTTTTTGCCTCCA ACT<br>GACTCCTACATATTAGCATTAAACAG           |
| T1mis-1       | CTGTTAATGCTAATCGTGATAGGGGTTTTT <u>C</u> GCCTCCA ACT<br>GACTCCTACATATTAGCATTAAACAG |
| T1mis-3       | CTGTTAATGCTAATCGTGATAGGGGTT <u>GTCG</u> ACTCCA ACT<br>GACTCCTACATATTAGCATTAAACAG  |
| T1mis-5       | CTGTTAATGCTAATCGTGATAGGGGT <u>GGTCAA</u> CTCCA ACT<br>GACTCCTACATATTAGCATTAAACAG  |
| T2            | TTAATGCTAATCGTGATAGGGGT                                                           |
| T2mis-1       | TTA <u>C</u> TGCTAATCGTGATAGGGGT                                                  |
| T2mis-3       | T <u>CACTG</u> GTAATCGTGATAGGGGT                                                  |
| T2mis-5       | T <u>CGCTAG</u> GTAATCGTGATAGGGGT                                                 |
| pre-miRNA-155 | CUGUUA AUGCUAAUCGUGAUAGGGGUUUUUGCCUCCA<br>ACUGACUCCUACAUAUUAGCAUUAACAG            |
| miRNA-155     | UUA AUGCUAAUCGUGAUAGGGGU                                                          |

The hairpin structures for H1, H2, H3 and H4 are labelled in the same color as it illustrated in the Figure 1. T1, T1mis-1, T1mis-3, T1mis-5 are the DNA analog of the pre-miRNA-155, single-base-mismatched strand, three-base-mismatched strand, and five-base-mismatched strand, respectively. T2, T2mis-1, T2mis-3, T2mis-5 are the DNA analog of the miRNA-155, single-base-mismatched strand, three-base-mismatched strand, and five-base-mismatched strand, respectively.

**Table S2. DNA sequences used for miRNA let-7a detection.**

| Name                | Oligonucleotide sequences (5'–3')                                                |
|---------------------|----------------------------------------------------------------------------------|
| H1                  | TGCCCTGCTATGGGATAATGTCGATATCCCATAGCAGGGC<br>AGAGCCCC                             |
| H2                  | TCGACATTATCCCATAGC/i6FAMdT/GGGCAGGGGCTCTGC<br>CCTGC/iBHQ1dT/ATGGGATA             |
| H3                  | GTAGGTTGTATAGTTACAGGTCAACTATAACAACCTACTAC<br>CTCA                                |
| H4                  | GACCTGTA ACTATAACA/iCy3/ACCTACTGAGGTAGTAGGT/i<br>BHQ2dT/GTATAGTT                 |
| Let-7a (DNA)        | TGAGGTAGTAGGTTGTATAGTT                                                           |
| Pre-let-7a<br>(DNA) | GGGTGAGGTAGTAGGTTGTATAGTTTGGGGCTCTGCCCT<br>GCTATGGGATAAACTATAACAATCTACTGTCTTTCCT |
